# Supplementary material for: Distributed flux balance analysis simulations of serial biomass fermentation by two organisms
Source: PLoS One. 2020 Jan 16;15(1):e0227363. doi: 10.1371/journal.pone.0227363 (PMC6964848; doi:10.1371/journal.pone.0227363)
Supplement: S1 Table — (XLSX) [file pone.0227363.s004.xlsx]

## Sheet: a. Ethanol
Media Name	Oxygen	Pipe Steps	First Organism Name	First Organism Growth Rate	Second Organism Name	Second Organism Growth Rate	Minimal Ethanol metabolite Production [g/Kg]	Minimal Ethanol metabolite Carbon Utilization [%] [g/Kg]	Maximal Ethanol metabolite Production [g/Kg]	Maximal Ethanol metabolite Carbon Utilization [%] [g/Kg]
CornFiber	YES	1	<i>E. coli</i>	0.4689			0	0	0	0
CornFiber	YES	2	<i>E. coli</i>	0.4689	<i>S. cerevisiae</i> WT	0.0469	0	0	0	0
CornFiber	YES	2	<i>E. coli</i>	0.4689	<i>S. cerevisiae RN1016 </i> (+ Xylose isomerase)	0.0469	0	0	0	0
CornFiber	YES	2	<i>E. coli</i>	0.4689	<i>C. acetobutylicum</i>	0.0469	0	0	0	0
CornCobs	YES	1	<i>E. coli</i>	0.3966			0	0	0	0
CornCobs	YES	2	<i>E. coli</i>	0.3966	<i>S. cerevisiae</i> WT	0.0397	0	0	0	0
CornCobs	YES	2	<i>E. coli</i>	0.3966	<i>S. cerevisiae RN1016 </i> (+ Xylose isomerase)	0.0397	0	0	0	0
CornCobs	YES	2	<i>E. coli</i>	0.3966	<i>C. acetobutylicum</i>	0.0397	0	0	0	0
CornCobs	YES	1	<i>S. cerevisiae RN1016 </i> (+ Xylose isomerase)	0.3866			0	0	0	0
CornCobs	YES	2	<i>S. cerevisiae RN1016 </i> (+ Xylose isomerase)	0.3866	<i>E. coli</i>	0.0387	0	0	0	0
CornCobs	YES	2	<i>S. cerevisiae RN1016 </i> (+ Xylose isomerase)	0.3866	<i>S. cerevisiae</i> WT	0.0387	0	0	0	0
CornCobs	YES	2	<i>S. cerevisiae RN1016 </i> (+ Xylose isomerase)	0.3866	<i>C. acetobutylicum</i>	0.0387	0	0	0	0
CornFiber	YES	1	<i>S. cerevisiae RN1016 </i> (+ Xylose isomerase)	0.3838			0	0	0	0
CornFiber	YES	2	<i>S. cerevisiae RN1016 </i> (+ Xylose isomerase)	0.3838	<i>E. coli</i>	0.0384	0	0	0	0
CornFiber	YES	2	<i>S. cerevisiae RN1016 </i> (+ Xylose isomerase)	0.3838	<i>S. cerevisiae</i> WT	0.0384	0	0	0	0
CornFiber	YES	2	<i>S. cerevisiae RN1016 </i> (+ Xylose isomerase)	0.3838	<i>C. acetobutylicum</i>	0.0384	0	0	0	0
CornStover	YES	1	<i>E. coli</i>	0.3491			0	0	0	0
CornStover	YES	2	<i>E. coli</i>	0.3491	<i>S. cerevisiae</i> WT	0.0349	0	0	0	0
CornStover	YES	2	<i>E. coli</i>	0.3491	<i>S. cerevisiae RN1016 </i> (+ Xylose isomerase)	0.0349	0	0	0	0
CornStover	YES	2	<i>E. coli</i>	0.3491	<i>C. acetobutylicum</i>	0.0349	0	0	0	0
CornStover	YES	1	<i>S. cerevisiae RN1016 </i> (+ Xylose isomerase)	0.3449			0	0	0	0
CornStover	YES	2	<i>S. cerevisiae RN1016 </i> (+ Xylose isomerase)	0.3449	<i>E. coli</i>	0.0345	0	0	0	0
CornStover	YES	2	<i>S. cerevisiae RN1016 </i> (+ Xylose isomerase)	0.3449	<i>S. cerevisiae</i> WT	0.0345	0	0	0	0
CornStover	YES	2	<i>S. cerevisiae RN1016 </i> (+ Xylose isomerase)	0.3449	<i>C. acetobutylicum</i>	0.0345	0	0	0	0
CornFiber	YES	1	<i>S. cerevisiae</i> WT	0.2811			0	0	0	0
CornFiber	YES	2	<i>S. cerevisiae</i> WT	0.2811	<i>E. coli</i>	0.0281	0	0	0	0
CornFiber	YES	2	<i>S. cerevisiae</i> WT	0.2811	<i>S. cerevisiae RN1016 </i> (+ Xylose isomerase)	0.0281	0	0	0	0
CornFiber	YES	2	<i>S. cerevisiae</i> WT	0.2811	<i>C. acetobutylicum</i>	0.0281	0	0	0	0
CornCobs	YES	2	<i>C. acetobutylicum</i>	0.2643	<i>E. coli</i>	0.0264	8.2554	1.3	73.6732	11.6
CornCobs	NO	2	<i>C. acetobutylicum</i>	0.2643	<i>E. coli</i>	0.0264	8.2554	1.3	73.6732	11.6
CornCobs	YES	1	<i>C. acetobutylicum</i>	0.2643			8.2554	1.3	8.2554	1.3
CornCobs	NO	1	<i>C. acetobutylicum</i>	0.2643			8.2554	1.3	8.2554	1.3
CornCobs	YES	2	<i>C. acetobutylicum</i>	0.2643	<i>S. cerevisiae</i> WT	0.0264	8.2554	1.3	8.2554	1.3
CornCobs	NO	2	<i>C. acetobutylicum</i>	0.2643	<i>S. cerevisiae</i> WT	0.0264	8.2554	1.3	8.2554	1.3
CornCobs	YES	2	<i>C. acetobutylicum</i>	0.2643	<i>S. cerevisiae RN1016 </i> (+ Xylose isomerase)	0.0264	8.2554	1.3	8.2554	1.3
CornCobs	NO	2	<i>C. acetobutylicum</i>	0.2643	<i>S. cerevisiae RN1016 </i> (+ Xylose isomerase)	0.0264	8.2554	1.3	8.2554	1.3
CornFiber	YES	2	<i>C. acetobutylicum</i>	0.2623	<i>E. coli</i>	0.0262	88.9695	11.7	88.9695	11.7
CornFiber	NO	2	<i>C. acetobutylicum</i>	0.2623	<i>E. coli</i>	0.0262	88.9695	11.7	88.9695	11.7
CornFiber	YES	1	<i>C. acetobutylicum</i>	0.2623			15.5066	2	15.5066	2
CornFiber	NO	1	<i>C. acetobutylicum</i>	0.2623			15.5066	2	15.5066	2
CornFiber	YES	2	<i>C. acetobutylicum</i>	0.2623	<i>S. cerevisiae</i> WT	0.0262	15.5066	2	15.5066	2
CornFiber	NO	2	<i>C. acetobutylicum</i>	0.2623	<i>S. cerevisiae</i> WT	0.0262	15.5066	2	15.5066	2
CornFiber	YES	2	<i>C. acetobutylicum</i>	0.2623	<i>S. cerevisiae RN1016 </i> (+ Xylose isomerase)	0.0262	15.5066	2	15.5066	2
CornFiber	NO	2	<i>C. acetobutylicum</i>	0.2623	<i>S. cerevisiae RN1016 </i> (+ Xylose isomerase)	0.0262	15.5066	2	15.5066	2
CornStover	YES	2	<i>C. acetobutylicum</i>	0.2488	<i>E. coli</i>	0.0249	61.5478	11	61.5478	11
CornStover	NO	2	<i>C. acetobutylicum</i>	0.2488	<i>E. coli</i>	0.0249	61.5478	11	61.5478	11
CornStover	YES	1	<i>C. acetobutylicum</i>	0.2488			12.5766	2.3	12.5766	2.3
CornStover	NO	1	<i>C. acetobutylicum</i>	0.2488			12.5766	2.3	12.5766	2.3
CornStover	YES	2	<i>C. acetobutylicum</i>	0.2488	<i>S. cerevisiae</i> WT	0.0249	12.5766	2.3	12.5766	2.3
CornStover	NO	2	<i>C. acetobutylicum</i>	0.2488	<i>S. cerevisiae</i> WT	0.0249	12.5766	2.3	12.5766	2.3
CornStover	YES	2	<i>C. acetobutylicum</i>	0.2488	<i>S. cerevisiae RN1016 </i> (+ Xylose isomerase)	0.0249	12.5766	2.3	12.5766	2.3
CornStover	NO	2	<i>C. acetobutylicum</i>	0.2488	<i>S. cerevisiae RN1016 </i> (+ Xylose isomerase)	0.0249	12.5766	2.3	12.5766	2.3
CornStover	YES	1	<i>S. cerevisiae</i> WT	0.2487			0	0	0	0
CornStover	YES	2	<i>S. cerevisiae</i> WT	0.2487	<i>E. coli</i>	0.0249	0	0	0	0
CornStover	YES	2	<i>S. cerevisiae</i> WT	0.2487	<i>S. cerevisiae RN1016 </i> (+ Xylose isomerase)	0.0249	0	0	0	0
CornStover	YES	2	<i>S. cerevisiae</i> WT	0.2487	<i>C. acetobutylicum</i>	0.0249	0	0	0	0
CornCobs	YES	1	<i>S. cerevisiae</i> WT	0.2477			0	0	0	0
CornCobs	YES	2	<i>S. cerevisiae</i> WT	0.2477	<i>E. coli</i>	0.0248	0	0	0	0
CornCobs	YES	2	<i>S. cerevisiae</i> WT	0.2477	<i>S. cerevisiae RN1016 </i> (+ Xylose isomerase)	0.0248	0	0	0	0
CornCobs	YES	2	<i>S. cerevisiae</i> WT	0.2477	<i>C. acetobutylicum</i>	0.0248	0	0	0	0
CornFiber	NO	1	<i>E. coli</i>	0.0791			155.761	20.5	155.761	20.5
CornFiber	NO	2	<i>E. coli</i>	0.0791	<i>S. cerevisiae</i> WT	0.0079	155.761	20.5	155.761	20.5
CornFiber	NO	2	<i>E. coli</i>	0.0791	<i>S. cerevisiae RN1016 </i> (+ Xylose isomerase)	0.0079	155.761	20.5	155.761	20.5
CornFiber	NO	2	<i>E. coli</i>	0.0791	<i>C. acetobutylicum</i>	0.0079	155.761	20.5	155.761	20.5
CornCobs	NO	1	<i>E. coli</i>	0.0696			152.707	24.1	152.707	24.1
CornCobs	NO	2	<i>E. coli</i>	0.0696	<i>S. cerevisiae</i> WT	0.007	152.707	24.1	152.707	24.1
CornCobs	NO	2	<i>E. coli</i>	0.0696	<i>S. cerevisiae RN1016 </i> (+ Xylose isomerase)	0.007	152.707	24.1	152.707	24.1
CornCobs	NO	2	<i>E. coli</i>	0.0696	<i>C. acetobutylicum</i>	0.007	152.707	24.1	152.707	24.1
CornCobs	NO	2	<i>S. cerevisiae RN1016 </i> (+ Xylose isomerase)	0.0642	<i>E. coli</i>	0.0064	282.179	44.5	308.055	48.6
CornCobs	NO	1	<i>S. cerevisiae RN1016 </i> (+ Xylose isomerase)	0.0642			268.642	42.4	300.825	47.5
CornCobs	NO	2	<i>S. cerevisiae RN1016 </i> (+ Xylose isomerase)	0.0642	<i>S. cerevisiae</i> WT	0.0064	268.642	42.4	300.825	47.5
CornCobs	NO	2	<i>S. cerevisiae RN1016 </i> (+ Xylose isomerase)	0.0642	<i>C. acetobutylicum</i>	0.0064	268.642	42.4	300.825	47.5
CornFiber	NO	2	<i>S. cerevisiae RN1016 </i> (+ Xylose isomerase)	0.0588	<i>E. coli</i>	0.0059	250.777	33	275.193	36.2
CornStover	NO	2	<i>S. cerevisiae RN1016 </i> (+ Xylose isomerase)	0.0588	<i>E. coli</i>	0.0059	230.945	41.4	251.306	45.1
CornStover	NO	1	<i>S. cerevisiae RN1016 </i> (+ Xylose isomerase)	0.0588			223.804	40.2	243.074	43.6
CornStover	NO	2	<i>S. cerevisiae RN1016 </i> (+ Xylose isomerase)	0.0588	<i>S. cerevisiae</i> WT	0.0059	223.804	40.2	243.074	43.6
CornStover	NO	2	<i>S. cerevisiae RN1016 </i> (+ Xylose isomerase)	0.0588	<i>C. acetobutylicum</i>	0.0059	223.804	40.2	243.074	43.6
CornFiber	NO	1	<i>S. cerevisiae RN1016 </i> (+ Xylose isomerase)	0.0588			215.327	28.3	239.587	31.5
CornFiber	NO	2	<i>S. cerevisiae RN1016 </i> (+ Xylose isomerase)	0.0588	<i>S. cerevisiae</i> WT	0.0059	215.327	28.3	239.587	31.5
CornFiber	NO	2	<i>S. cerevisiae RN1016 </i> (+ Xylose isomerase)	0.0588	<i>C. acetobutylicum</i>	0.0059	215.327	28.3	239.587	31.5
CornStover	NO	1	<i>E. coli</i>	0.0575			131.506	23.6	131.506	23.6
CornStover	NO	2	<i>E. coli</i>	0.0575	<i>S. cerevisiae</i> WT	0.0058	131.506	23.6	131.506	23.6
CornStover	NO	2	<i>E. coli</i>	0.0575	<i>S. cerevisiae RN1016 </i> (+ Xylose isomerase)	0.0058	131.506	23.6	131.506	23.6
CornStover	NO	2	<i>E. coli</i>	0.0575	<i>C. acetobutylicum</i>	0.0058	131.506	23.6	131.506	23.6
CornCobs	NO	2	<i>S. cerevisiae</i> WT	0.0499	<i>S. cerevisiae RN1016 </i> (+ Xylose isomerase)	0.005	271.788	42.9	304.139	48
CornCobs	NO	2	<i>S. cerevisiae</i> WT	0.0499	<i>E. coli</i>	0.005	207.227	32.7	233.729	36.9
CornCobs	NO	1	<i>S. cerevisiae</i> WT	0.0499			132.474	20.9	164.846	26
CornCobs	NO	2	<i>S. cerevisiae</i> WT	0.0499	<i>C. acetobutylicum</i>	0.005	132.474	20.9	164.846	26
CornFiber	NO	2	<i>S. cerevisiae</i> WT	0.0483	<i>S. cerevisiae RN1016 </i> (+ Xylose isomerase)	0.0048	216.65	28.5	241.26	31.7
CornFiber	NO	2	<i>S. cerevisiae</i> WT	0.0483	<i>E. coli</i>	0.0048	204.514	26.9	228.561	30.1
CornFiber	NO	1	<i>S. cerevisiae</i> WT	0.0483			126.858	16.7	151.482	19.9
CornFiber	NO	2	<i>S. cerevisiae</i> WT	0.0483	<i>C. acetobutylicum</i>	0.0048	126.858	16.7	151.482	19.9
CornStover	NO	2	<i>S. cerevisiae</i> WT	0.0477	<i>S. cerevisiae RN1016 </i> (+ Xylose isomerase)	0.0048	225.594	40.5	244.53	43.9
CornStover	NO	2	<i>S. cerevisiae</i> WT	0.0477	<i>E. coli</i>	0.0048	183.448	32.9	202.398	36.3
CornStover	NO	1	<i>S. cerevisiae</i> WT	0.0477			130.861	23.5	149.809	26.9
CornStover	NO	2	<i>S. cerevisiae</i> WT	0.0477	<i>C. acetobutylicum</i>	0.0048	130.861	23.5	149.809	26.9

## Sheet: b. Acetone
Media Name	Oxygen	Pipe Steps	First Organism Name	First Organism Growth Rate	Second Organism Name	Second Organism Growth Rate	Minimal Acetone metabolite Production [g/Kg]	Minimal Acetone metabolite Carbon Utilization [%] [g/Kg]	Maximal Acetone metabolite Production [g/Kg]	Maximal Acetone metabolite Carbon Utilization [%] [g/Kg]
CornFiber	YES	1	<i>E. coli</i>	0.4689			0	0	0	0
CornFiber	YES	2	<i>E. coli</i>	0.4689	<i>S. cerevisiae</i> WT	0.0469	0	0	0	0
CornFiber	YES	2	<i>E. coli</i>	0.4689	<i>S. cerevisiae RN1016 </i> (+ Xylose isomerase)	0.0469	0	0	0	0
CornFiber	YES	2	<i>E. coli</i>	0.4689	<i>C. acetobutylicum</i>	0.0469	0	0	0	0
CornCobs	YES	1	<i>E. coli</i>	0.3966			0	0	0	0
CornCobs	YES	2	<i>E. coli</i>	0.3966	<i>S. cerevisiae</i> WT	0.0397	0	0	0	0
CornCobs	YES	2	<i>E. coli</i>	0.3966	<i>S. cerevisiae RN1016 </i> (+ Xylose isomerase)	0.0397	0	0	0	0
CornCobs	YES	2	<i>E. coli</i>	0.3966	<i>C. acetobutylicum</i>	0.0397	0	0	0	0
CornCobs	YES	1	<i>S. cerevisiae RN1016 </i> (+ Xylose isomerase)	0.3866			0	0	0	0
CornCobs	YES	2	<i>S. cerevisiae RN1016 </i> (+ Xylose isomerase)	0.3866	<i>E. coli</i>	0.0387	0	0	0	0
CornCobs	YES	2	<i>S. cerevisiae RN1016 </i> (+ Xylose isomerase)	0.3866	<i>S. cerevisiae</i> WT	0.0387	0	0	0	0
CornCobs	YES	2	<i>S. cerevisiae RN1016 </i> (+ Xylose isomerase)	0.3866	<i>C. acetobutylicum</i>	0.0387	0	0	0	0
CornFiber	YES	1	<i>S. cerevisiae RN1016 </i> (+ Xylose isomerase)	0.3838			0	0	0	0
CornFiber	YES	2	<i>S. cerevisiae RN1016 </i> (+ Xylose isomerase)	0.3838	<i>E. coli</i>	0.0384	0	0	0	0
CornFiber	YES	2	<i>S. cerevisiae RN1016 </i> (+ Xylose isomerase)	0.3838	<i>S. cerevisiae</i> WT	0.0384	0	0	0	0
CornFiber	YES	2	<i>S. cerevisiae RN1016 </i> (+ Xylose isomerase)	0.3838	<i>C. acetobutylicum</i>	0.0384	0	0	0	0
CornStover	YES	1	<i>E. coli</i>	0.3491			0	0	0	0
CornStover	YES	2	<i>E. coli</i>	0.3491	<i>S. cerevisiae</i> WT	0.0349	0	0	0	0
CornStover	YES	2	<i>E. coli</i>	0.3491	<i>S. cerevisiae RN1016 </i> (+ Xylose isomerase)	0.0349	0	0	0	0
CornStover	YES	2	<i>E. coli</i>	0.3491	<i>C. acetobutylicum</i>	0.0349	0	0	0	0
CornStover	YES	1	<i>S. cerevisiae RN1016 </i> (+ Xylose isomerase)	0.3449			0	0	0	0
CornStover	YES	2	<i>S. cerevisiae RN1016 </i> (+ Xylose isomerase)	0.3449	<i>E. coli</i>	0.0345	0	0	0	0
CornStover	YES	2	<i>S. cerevisiae RN1016 </i> (+ Xylose isomerase)	0.3449	<i>S. cerevisiae</i> WT	0.0345	0	0	0	0
CornStover	YES	2	<i>S. cerevisiae RN1016 </i> (+ Xylose isomerase)	0.3449	<i>C. acetobutylicum</i>	0.0345	0	0	0	0
CornFiber	YES	1	<i>S. cerevisiae</i> WT	0.2811			0	0	0	0
CornFiber	YES	2	<i>S. cerevisiae</i> WT	0.2811	<i>E. coli</i>	0.0281	0	0	0	0
CornFiber	YES	2	<i>S. cerevisiae</i> WT	0.2811	<i>S. cerevisiae RN1016 </i> (+ Xylose isomerase)	0.0281	0	0	0	0
CornFiber	YES	2	<i>S. cerevisiae</i> WT	0.2811	<i>C. acetobutylicum</i>	0.0281	0	0	0	0
CornCobs	YES	1	<i>C. acetobutylicum</i>	0.2643			0	0	0	0
CornCobs	NO	1	<i>C. acetobutylicum</i>	0.2643			0	0	0	0
CornCobs	YES	2	<i>C. acetobutylicum</i>	0.2643	<i>E. coli</i>	0.0264	0	0	0	0
CornCobs	NO	2	<i>C. acetobutylicum</i>	0.2643	<i>E. coli</i>	0.0264	0	0	0	0
CornCobs	YES	2	<i>C. acetobutylicum</i>	0.2643	<i>S. cerevisiae</i> WT	0.0264	0	0	0	0
CornCobs	NO	2	<i>C. acetobutylicum</i>	0.2643	<i>S. cerevisiae</i> WT	0.0264	0	0	0	0
CornCobs	YES	2	<i>C. acetobutylicum</i>	0.2643	<i>S. cerevisiae RN1016 </i> (+ Xylose isomerase)	0.0264	0	0	0	0
CornCobs	NO	2	<i>C. acetobutylicum</i>	0.2643	<i>S. cerevisiae RN1016 </i> (+ Xylose isomerase)	0.0264	0	0	0	0
CornFiber	YES	1	<i>C. acetobutylicum</i>	0.2623			0	0	0	0
CornFiber	NO	1	<i>C. acetobutylicum</i>	0.2623			0	0	0	0
CornFiber	YES	2	<i>C. acetobutylicum</i>	0.2623	<i>E. coli</i>	0.0262	0	0	0	0
CornFiber	NO	2	<i>C. acetobutylicum</i>	0.2623	<i>E. coli</i>	0.0262	0	0	0	0
CornFiber	YES	2	<i>C. acetobutylicum</i>	0.2623	<i>S. cerevisiae</i> WT	0.0262	0	0	0	0
CornFiber	NO	2	<i>C. acetobutylicum</i>	0.2623	<i>S. cerevisiae</i> WT	0.0262	0	0	0	0
CornFiber	YES	2	<i>C. acetobutylicum</i>	0.2623	<i>S. cerevisiae RN1016 </i> (+ Xylose isomerase)	0.0262	0	0	0	0
CornFiber	NO	2	<i>C. acetobutylicum</i>	0.2623	<i>S. cerevisiae RN1016 </i> (+ Xylose isomerase)	0.0262	0	0	0	0
CornStover	YES	1	<i>C. acetobutylicum</i>	0.2488			0	0	0	0
CornStover	NO	1	<i>C. acetobutylicum</i>	0.2488			0	0	0	0
CornStover	YES	2	<i>C. acetobutylicum</i>	0.2488	<i>E. coli</i>	0.0249	0	0	0	0
CornStover	NO	2	<i>C. acetobutylicum</i>	0.2488	<i>E. coli</i>	0.0249	0	0	0	0
CornStover	YES	2	<i>C. acetobutylicum</i>	0.2488	<i>S. cerevisiae</i> WT	0.0249	0	0	0	0
CornStover	NO	2	<i>C. acetobutylicum</i>	0.2488	<i>S. cerevisiae</i> WT	0.0249	0	0	0	0
CornStover	YES	2	<i>C. acetobutylicum</i>	0.2488	<i>S. cerevisiae RN1016 </i> (+ Xylose isomerase)	0.0249	0	0	0	0
CornStover	NO	2	<i>C. acetobutylicum</i>	0.2488	<i>S. cerevisiae RN1016 </i> (+ Xylose isomerase)	0.0249	0	0	0	0
CornStover	YES	1	<i>S. cerevisiae</i> WT	0.2487			0	0	0	0
CornStover	YES	2	<i>S. cerevisiae</i> WT	0.2487	<i>E. coli</i>	0.0249	0	0	0	0
CornStover	YES	2	<i>S. cerevisiae</i> WT	0.2487	<i>S. cerevisiae RN1016 </i> (+ Xylose isomerase)	0.0249	0	0	0	0
CornStover	YES	2	<i>S. cerevisiae</i> WT	0.2487	<i>C. acetobutylicum</i>	0.0249	0	0	0	0
CornCobs	YES	1	<i>S. cerevisiae</i> WT	0.2477			0	0	0	0
CornCobs	YES	2	<i>S. cerevisiae</i> WT	0.2477	<i>E. coli</i>	0.0248	0	0	0	0
CornCobs	YES	2	<i>S. cerevisiae</i> WT	0.2477	<i>S. cerevisiae RN1016 </i> (+ Xylose isomerase)	0.0248	0	0	0	0
CornCobs	YES	2	<i>S. cerevisiae</i> WT	0.2477	<i>C. acetobutylicum</i>	0.0248	0	0	0	0
CornFiber	NO	1	<i>E. coli</i>	0.0791			0	0	0	0
CornFiber	NO	2	<i>E. coli</i>	0.0791	<i>S. cerevisiae</i> WT	0.0079	0	0	0	0
CornFiber	NO	2	<i>E. coli</i>	0.0791	<i>S. cerevisiae RN1016 </i> (+ Xylose isomerase)	0.0079	0	0	0	0
CornFiber	NO	2	<i>E. coli</i>	0.0791	<i>C. acetobutylicum</i>	0.0079	0	0	0	0
CornCobs	NO	1	<i>E. coli</i>	0.0696			0	0	0	0
CornCobs	NO	2	<i>E. coli</i>	0.0696	<i>S. cerevisiae</i> WT	0.007	0	0	0	0
CornCobs	NO	2	<i>E. coli</i>	0.0696	<i>S. cerevisiae RN1016 </i> (+ Xylose isomerase)	0.007	0	0	0	0
CornCobs	NO	2	<i>E. coli</i>	0.0696	<i>C. acetobutylicum</i>	0.007	0	0	0	0
CornCobs	NO	1	<i>S. cerevisiae RN1016 </i> (+ Xylose isomerase)	0.0642			0	0	0	0
CornCobs	NO	2	<i>S. cerevisiae RN1016 </i> (+ Xylose isomerase)	0.0642	<i>E. coli</i>	0.0064	0	0	0	0
CornCobs	NO	2	<i>S. cerevisiae RN1016 </i> (+ Xylose isomerase)	0.0642	<i>S. cerevisiae</i> WT	0.0064	0	0	0	0
CornCobs	NO	2	<i>S. cerevisiae RN1016 </i> (+ Xylose isomerase)	0.0642	<i>C. acetobutylicum</i>	0.0064	0	0	0	0
CornFiber	NO	1	<i>S. cerevisiae RN1016 </i> (+ Xylose isomerase)	0.0588			0	0	0	0
CornStover	NO	1	<i>S. cerevisiae RN1016 </i> (+ Xylose isomerase)	0.0588			0	0	0	0
CornFiber	NO	2	<i>S. cerevisiae RN1016 </i> (+ Xylose isomerase)	0.0588	<i>E. coli</i>	0.0059	0	0	0	0
CornFiber	NO	2	<i>S. cerevisiae RN1016 </i> (+ Xylose isomerase)	0.0588	<i>S. cerevisiae</i> WT	0.0059	0	0	0	0
CornFiber	NO	2	<i>S. cerevisiae RN1016 </i> (+ Xylose isomerase)	0.0588	<i>C. acetobutylicum</i>	0.0059	0	0	0	0
CornStover	NO	2	<i>S. cerevisiae RN1016 </i> (+ Xylose isomerase)	0.0588	<i>E. coli</i>	0.0059	0	0	0	0
CornStover	NO	2	<i>S. cerevisiae RN1016 </i> (+ Xylose isomerase)	0.0588	<i>S. cerevisiae</i> WT	0.0059	0	0	0	0
CornStover	NO	2	<i>S. cerevisiae RN1016 </i> (+ Xylose isomerase)	0.0588	<i>C. acetobutylicum</i>	0.0059	0	0	0	0
CornStover	NO	1	<i>E. coli</i>	0.0575			0	0	0	0
CornStover	NO	2	<i>E. coli</i>	0.0575	<i>S. cerevisiae</i> WT	0.0058	0	0	0	0
CornStover	NO	2	<i>E. coli</i>	0.0575	<i>S. cerevisiae RN1016 </i> (+ Xylose isomerase)	0.0058	0	0	0	0
CornStover	NO	2	<i>E. coli</i>	0.0575	<i>C. acetobutylicum</i>	0.0058	0	0	0	0
CornCobs	NO	1	<i>S. cerevisiae</i> WT	0.0499			0	0	0	0
CornCobs	NO	2	<i>S. cerevisiae</i> WT	0.0499	<i>E. coli</i>	0.005	0	0	0	0
CornCobs	NO	2	<i>S. cerevisiae</i> WT	0.0499	<i>S. cerevisiae RN1016 </i> (+ Xylose isomerase)	0.005	0	0	0	0
CornCobs	NO	2	<i>S. cerevisiae</i> WT	0.0499	<i>C. acetobutylicum</i>	0.005	0	0	0	0
CornFiber	NO	1	<i>S. cerevisiae</i> WT	0.0483			0	0	0	0
CornFiber	NO	2	<i>S. cerevisiae</i> WT	0.0483	<i>E. coli</i>	0.0048	0	0	0	0
CornFiber	NO	2	<i>S. cerevisiae</i> WT	0.0483	<i>S. cerevisiae RN1016 </i> (+ Xylose isomerase)	0.0048	0	0	0	0
CornFiber	NO	2	<i>S. cerevisiae</i> WT	0.0483	<i>C. acetobutylicum</i>	0.0048	0	0	0	0
CornStover	NO	1	<i>S. cerevisiae</i> WT	0.0477			0	0	0	0
CornStover	NO	2	<i>S. cerevisiae</i> WT	0.0477	<i>E. coli</i>	0.0048	0	0	0	0
CornStover	NO	2	<i>S. cerevisiae</i> WT	0.0477	<i>S. cerevisiae RN1016 </i> (+ Xylose isomerase)	0.0048	0	0	0	0
CornStover	NO	2	<i>S. cerevisiae</i> WT	0.0477	<i>C. acetobutylicum</i>	0.0048	0	0	0	0

## Sheet: c. 1-Butanol
Media Name	Oxygen	Pipe Steps	First Organism Name	First Organism Growth Rate	Second Organism Name	Second Organism Growth Rate	Minimal 1-Butanol metabolite Production [g/Kg]	Minimal 1-Butanol metabolite Carbon Utilization [%] [g/Kg]	Maximal 1-Butanol metabolite Production [g/Kg]	Maximal 1-Butanol metabolite Carbon Utilization [%] [g/Kg]
CornFiber	YES	1	<i>E. coli</i>	0.4689			0	0	0	0
CornFiber	YES	2	<i>E. coli</i>	0.4689	<i>S. cerevisiae</i> WT	0.0469	0	0	0	0
CornFiber	YES	2	<i>E. coli</i>	0.4689	<i>S. cerevisiae RN1016 </i> (+ Xylose isomerase)	0.0469	0	0	0	0
CornFiber	YES	2	<i>E. coli</i>	0.4689	<i>C. acetobutylicum</i>	0.0469	0	0	0	0
CornCobs	YES	1	<i>E. coli</i>	0.3966			0	0	0	0
CornCobs	YES	2	<i>E. coli</i>	0.3966	<i>S. cerevisiae</i> WT	0.0397	0	0	0	0
CornCobs	YES	2	<i>E. coli</i>	0.3966	<i>S. cerevisiae RN1016 </i> (+ Xylose isomerase)	0.0397	0	0	0	0
CornCobs	YES	2	<i>E. coli</i>	0.3966	<i>C. acetobutylicum</i>	0.0397	0	0	0	0
CornCobs	YES	1	<i>S. cerevisiae RN1016 </i> (+ Xylose isomerase)	0.3866			0	0	0	0
CornCobs	YES	2	<i>S. cerevisiae RN1016 </i> (+ Xylose isomerase)	0.3866	<i>E. coli</i>	0.0387	0	0	0	0
CornCobs	YES	2	<i>S. cerevisiae RN1016 </i> (+ Xylose isomerase)	0.3866	<i>S. cerevisiae</i> WT	0.0387	0	0	0	0
CornCobs	YES	2	<i>S. cerevisiae RN1016 </i> (+ Xylose isomerase)	0.3866	<i>C. acetobutylicum</i>	0.0387	0	0	0	0
CornFiber	YES	1	<i>S. cerevisiae RN1016 </i> (+ Xylose isomerase)	0.3838			0	0	0	0
CornFiber	YES	2	<i>S. cerevisiae RN1016 </i> (+ Xylose isomerase)	0.3838	<i>E. coli</i>	0.0384	0	0	0	0
CornFiber	YES	2	<i>S. cerevisiae RN1016 </i> (+ Xylose isomerase)	0.3838	<i>S. cerevisiae</i> WT	0.0384	0	0	0	0
CornFiber	YES	2	<i>S. cerevisiae RN1016 </i> (+ Xylose isomerase)	0.3838	<i>C. acetobutylicum</i>	0.0384	0	0	0	0
CornStover	YES	1	<i>E. coli</i>	0.3491			0	0	0	0
CornStover	YES	2	<i>E. coli</i>	0.3491	<i>S. cerevisiae</i> WT	0.0349	0	0	0	0
CornStover	YES	2	<i>E. coli</i>	0.3491	<i>S. cerevisiae RN1016 </i> (+ Xylose isomerase)	0.0349	0	0	0	0
CornStover	YES	2	<i>E. coli</i>	0.3491	<i>C. acetobutylicum</i>	0.0349	0	0	0	0
CornStover	YES	1	<i>S. cerevisiae RN1016 </i> (+ Xylose isomerase)	0.3449			0	0	0	0
CornStover	YES	2	<i>S. cerevisiae RN1016 </i> (+ Xylose isomerase)	0.3449	<i>E. coli</i>	0.0345	0	0	0	0
CornStover	YES	2	<i>S. cerevisiae RN1016 </i> (+ Xylose isomerase)	0.3449	<i>S. cerevisiae</i> WT	0.0345	0	0	0	0
CornStover	YES	2	<i>S. cerevisiae RN1016 </i> (+ Xylose isomerase)	0.3449	<i>C. acetobutylicum</i>	0.0345	0	0	0	0
CornFiber	YES	1	<i>S. cerevisiae</i> WT	0.2811			0	0	0	0
CornFiber	YES	2	<i>S. cerevisiae</i> WT	0.2811	<i>E. coli</i>	0.0281	0	0	0	0
CornFiber	YES	2	<i>S. cerevisiae</i> WT	0.2811	<i>S. cerevisiae RN1016 </i> (+ Xylose isomerase)	0.0281	0	0	0	0
CornFiber	YES	2	<i>S. cerevisiae</i> WT	0.2811	<i>C. acetobutylicum</i>	0.0281	0	0	0	0
CornCobs	YES	1	<i>C. acetobutylicum</i>	0.2643			0	0	0	0
CornCobs	NO	1	<i>C. acetobutylicum</i>	0.2643			0	0	0	0
CornCobs	YES	2	<i>C. acetobutylicum</i>	0.2643	<i>E. coli</i>	0.0264	0	0	0	0
CornCobs	NO	2	<i>C. acetobutylicum</i>	0.2643	<i>E. coli</i>	0.0264	0	0	0	0
CornCobs	YES	2	<i>C. acetobutylicum</i>	0.2643	<i>S. cerevisiae</i> WT	0.0264	0	0	0	0
CornCobs	NO	2	<i>C. acetobutylicum</i>	0.2643	<i>S. cerevisiae</i> WT	0.0264	0	0	0	0
CornCobs	YES	2	<i>C. acetobutylicum</i>	0.2643	<i>S. cerevisiae RN1016 </i> (+ Xylose isomerase)	0.0264	0	0	0	0
CornCobs	NO	2	<i>C. acetobutylicum</i>	0.2643	<i>S. cerevisiae RN1016 </i> (+ Xylose isomerase)	0.0264	0	0	0	0
CornFiber	YES	1	<i>C. acetobutylicum</i>	0.2623			0	0	0	0
CornFiber	NO	1	<i>C. acetobutylicum</i>	0.2623			0	0	0	0
CornFiber	YES	2	<i>C. acetobutylicum</i>	0.2623	<i>E. coli</i>	0.0262	0	0	0	0
CornFiber	NO	2	<i>C. acetobutylicum</i>	0.2623	<i>E. coli</i>	0.0262	0	0	0	0
CornFiber	YES	2	<i>C. acetobutylicum</i>	0.2623	<i>S. cerevisiae</i> WT	0.0262	0	0	0	0
CornFiber	NO	2	<i>C. acetobutylicum</i>	0.2623	<i>S. cerevisiae</i> WT	0.0262	0	0	0	0
CornFiber	YES	2	<i>C. acetobutylicum</i>	0.2623	<i>S. cerevisiae RN1016 </i> (+ Xylose isomerase)	0.0262	0	0	0	0
CornFiber	NO	2	<i>C. acetobutylicum</i>	0.2623	<i>S. cerevisiae RN1016 </i> (+ Xylose isomerase)	0.0262	0	0	0	0
CornStover	YES	1	<i>C. acetobutylicum</i>	0.2488			0	0	0	0
CornStover	NO	1	<i>C. acetobutylicum</i>	0.2488			0	0	0	0
CornStover	YES	2	<i>C. acetobutylicum</i>	0.2488	<i>E. coli</i>	0.0249	0	0	0	0
CornStover	NO	2	<i>C. acetobutylicum</i>	0.2488	<i>E. coli</i>	0.0249	0	0	0	0
CornStover	YES	2	<i>C. acetobutylicum</i>	0.2488	<i>S. cerevisiae</i> WT	0.0249	0	0	0	0
CornStover	NO	2	<i>C. acetobutylicum</i>	0.2488	<i>S. cerevisiae</i> WT	0.0249	0	0	0	0
CornStover	YES	2	<i>C. acetobutylicum</i>	0.2488	<i>S. cerevisiae RN1016 </i> (+ Xylose isomerase)	0.0249	0	0	0	0
CornStover	NO	2	<i>C. acetobutylicum</i>	0.2488	<i>S. cerevisiae RN1016 </i> (+ Xylose isomerase)	0.0249	0	0	0	0
CornStover	YES	1	<i>S. cerevisiae</i> WT	0.2487			0	0	0	0
CornStover	YES	2	<i>S. cerevisiae</i> WT	0.2487	<i>E. coli</i>	0.0249	0	0	0	0
CornStover	YES	2	<i>S. cerevisiae</i> WT	0.2487	<i>S. cerevisiae RN1016 </i> (+ Xylose isomerase)	0.0249	0	0	0	0
CornStover	YES	2	<i>S. cerevisiae</i> WT	0.2487	<i>C. acetobutylicum</i>	0.0249	0	0	0	0
CornCobs	YES	1	<i>S. cerevisiae</i> WT	0.2477			0	0	0	0
CornCobs	YES	2	<i>S. cerevisiae</i> WT	0.2477	<i>E. coli</i>	0.0248	0	0	0	0
CornCobs	YES	2	<i>S. cerevisiae</i> WT	0.2477	<i>S. cerevisiae RN1016 </i> (+ Xylose isomerase)	0.0248	0	0	0	0
CornCobs	YES	2	<i>S. cerevisiae</i> WT	0.2477	<i>C. acetobutylicum</i>	0.0248	0	0	0	0
CornFiber	NO	1	<i>E. coli</i>	0.0791			0	0	0	0
CornFiber	NO	2	<i>E. coli</i>	0.0791	<i>S. cerevisiae</i> WT	0.0079	0	0	0	0
CornFiber	NO	2	<i>E. coli</i>	0.0791	<i>S. cerevisiae RN1016 </i> (+ Xylose isomerase)	0.0079	0	0	0	0
CornFiber	NO	2	<i>E. coli</i>	0.0791	<i>C. acetobutylicum</i>	0.0079	0	0	0	0
CornCobs	NO	1	<i>E. coli</i>	0.0696			0	0	0	0
CornCobs	NO	2	<i>E. coli</i>	0.0696	<i>S. cerevisiae</i> WT	0.007	0	0	0	0
CornCobs	NO	2	<i>E. coli</i>	0.0696	<i>S. cerevisiae RN1016 </i> (+ Xylose isomerase)	0.007	0	0	0	0
CornCobs	NO	2	<i>E. coli</i>	0.0696	<i>C. acetobutylicum</i>	0.007	0	0	0	0
CornCobs	NO	1	<i>S. cerevisiae RN1016 </i> (+ Xylose isomerase)	0.0642			0	0	0	0
CornCobs	NO	2	<i>S. cerevisiae RN1016 </i> (+ Xylose isomerase)	0.0642	<i>E. coli</i>	0.0064	0	0	0	0
CornCobs	NO	2	<i>S. cerevisiae RN1016 </i> (+ Xylose isomerase)	0.0642	<i>S. cerevisiae</i> WT	0.0064	0	0	0	0
CornCobs	NO	2	<i>S. cerevisiae RN1016 </i> (+ Xylose isomerase)	0.0642	<i>C. acetobutylicum</i>	0.0064	0	0	0	0
CornFiber	NO	1	<i>S. cerevisiae RN1016 </i> (+ Xylose isomerase)	0.0588			0	0	0	0
CornStover	NO	1	<i>S. cerevisiae RN1016 </i> (+ Xylose isomerase)	0.0588			0	0	0	0
CornFiber	NO	2	<i>S. cerevisiae RN1016 </i> (+ Xylose isomerase)	0.0588	<i>E. coli</i>	0.0059	0	0	0	0
CornFiber	NO	2	<i>S. cerevisiae RN1016 </i> (+ Xylose isomerase)	0.0588	<i>S. cerevisiae</i> WT	0.0059	0	0	0	0
CornFiber	NO	2	<i>S. cerevisiae RN1016 </i> (+ Xylose isomerase)	0.0588	<i>C. acetobutylicum</i>	0.0059	0	0	0	0
CornStover	NO	2	<i>S. cerevisiae RN1016 </i> (+ Xylose isomerase)	0.0588	<i>E. coli</i>	0.0059	0	0	0	0
CornStover	NO	2	<i>S. cerevisiae RN1016 </i> (+ Xylose isomerase)	0.0588	<i>S. cerevisiae</i> WT	0.0059	0	0	0	0
CornStover	NO	2	<i>S. cerevisiae RN1016 </i> (+ Xylose isomerase)	0.0588	<i>C. acetobutylicum</i>	0.0059	0	0	0	0
CornStover	NO	1	<i>E. coli</i>	0.0575			0	0	0	0
CornStover	NO	2	<i>E. coli</i>	0.0575	<i>S. cerevisiae</i> WT	0.0058	0	0	0	0
CornStover	NO	2	<i>E. coli</i>	0.0575	<i>S. cerevisiae RN1016 </i> (+ Xylose isomerase)	0.0058	0	0	0	0
CornStover	NO	2	<i>E. coli</i>	0.0575	<i>C. acetobutylicum</i>	0.0058	0	0	0	0
CornCobs	NO	1	<i>S. cerevisiae</i> WT	0.0499			0	0	0	0
CornCobs	NO	2	<i>S. cerevisiae</i> WT	0.0499	<i>E. coli</i>	0.005	0	0	0	0
CornCobs	NO	2	<i>S. cerevisiae</i> WT	0.0499	<i>S. cerevisiae RN1016 </i> (+ Xylose isomerase)	0.005	0	0	0	0
CornCobs	NO	2	<i>S. cerevisiae</i> WT	0.0499	<i>C. acetobutylicum</i>	0.005	0	0	0	0
CornFiber	NO	1	<i>S. cerevisiae</i> WT	0.0483			0	0	0	0
CornFiber	NO	2	<i>S. cerevisiae</i> WT	0.0483	<i>E. coli</i>	0.0048	0	0	0	0
CornFiber	NO	2	<i>S. cerevisiae</i> WT	0.0483	<i>S. cerevisiae RN1016 </i> (+ Xylose isomerase)	0.0048	0	0	0	0
CornFiber	NO	2	<i>S. cerevisiae</i> WT	0.0483	<i>C. acetobutylicum</i>	0.0048	0	0	0	0
CornStover	NO	1	<i>S. cerevisiae</i> WT	0.0477			0	0	0	0
CornStover	NO	2	<i>S. cerevisiae</i> WT	0.0477	<i>E. coli</i>	0.0048	0	0	0	0
CornStover	NO	2	<i>S. cerevisiae</i> WT	0.0477	<i>S. cerevisiae RN1016 </i> (+ Xylose isomerase)	0.0048	0	0	0	0
CornStover	NO	2	<i>S. cerevisiae</i> WT	0.0477	<i>C. acetobutylicum</i>	0.0048	0	0	0	0

## Sheet: d. (S)-Propane-1,2-diol
Media Name	Oxygen	Pipe Steps	First Organism Name	First Organism Growth Rate	Second Organism Name	Second Organism Growth Rate	Minimal (S)-Propane-1,2-diol metabolite Production [g/Kg]	Minimal (S)-Propane-1,2-diol metabolite Carbon Utilization [%] [g/Kg]	Maximal (S)-Propane-1,2-diol metabolite Production [g/Kg]	Maximal (S)-Propane-1,2-diol metabolite Carbon Utilization [%] [g/Kg]
CornFiber	YES	1	<i>E. coli</i>	0.4689			0	0	0	0
CornFiber	YES	2	<i>E. coli</i>	0.4689	<i>S. cerevisiae</i> WT	0.0469	0	0	0	0
CornFiber	YES	2	<i>E. coli</i>	0.4689	<i>S. cerevisiae RN1016 </i> (+ Xylose isomerase)	0.0469	0	0	0	0
CornFiber	YES	2	<i>E. coli</i>	0.4689	<i>C. acetobutylicum</i>	0.0469	0	0	0	0
CornCobs	YES	1	<i>E. coli</i>	0.3966			0	0	0	0
CornCobs	YES	2	<i>E. coli</i>	0.3966	<i>S. cerevisiae</i> WT	0.0397	0	0	0	0
CornCobs	YES	2	<i>E. coli</i>	0.3966	<i>S. cerevisiae RN1016 </i> (+ Xylose isomerase)	0.0397	0	0	0	0
CornCobs	YES	2	<i>E. coli</i>	0.3966	<i>C. acetobutylicum</i>	0.0397	0	0	0	0
CornCobs	YES	1	<i>S. cerevisiae RN1016 </i> (+ Xylose isomerase)	0.3866			0	0	0	0
CornCobs	YES	2	<i>S. cerevisiae RN1016 </i> (+ Xylose isomerase)	0.3866	<i>E. coli</i>	0.0387	0	0	0	0
CornCobs	YES	2	<i>S. cerevisiae RN1016 </i> (+ Xylose isomerase)	0.3866	<i>S. cerevisiae</i> WT	0.0387	0	0	0	0
CornCobs	YES	2	<i>S. cerevisiae RN1016 </i> (+ Xylose isomerase)	0.3866	<i>C. acetobutylicum</i>	0.0387	0	0	0	0
CornFiber	YES	1	<i>S. cerevisiae RN1016 </i> (+ Xylose isomerase)	0.3838			0	0	0	0
CornFiber	YES	2	<i>S. cerevisiae RN1016 </i> (+ Xylose isomerase)	0.3838	<i>E. coli</i>	0.0384	0	0	0	0
CornFiber	YES	2	<i>S. cerevisiae RN1016 </i> (+ Xylose isomerase)	0.3838	<i>S. cerevisiae</i> WT	0.0384	0	0	0	0
CornFiber	YES	2	<i>S. cerevisiae RN1016 </i> (+ Xylose isomerase)	0.3838	<i>C. acetobutylicum</i>	0.0384	0	0	0	0
CornStover	YES	1	<i>E. coli</i>	0.3491			0	0	0	0
CornStover	YES	2	<i>E. coli</i>	0.3491	<i>S. cerevisiae</i> WT	0.0349	0	0	0	0
CornStover	YES	2	<i>E. coli</i>	0.3491	<i>S. cerevisiae RN1016 </i> (+ Xylose isomerase)	0.0349	0	0	0	0
CornStover	YES	2	<i>E. coli</i>	0.3491	<i>C. acetobutylicum</i>	0.0349	0	0	0	0
CornStover	YES	1	<i>S. cerevisiae RN1016 </i> (+ Xylose isomerase)	0.3449			0	0	0	0
CornStover	YES	2	<i>S. cerevisiae RN1016 </i> (+ Xylose isomerase)	0.3449	<i>E. coli</i>	0.0345	0	0	0	0
CornStover	YES	2	<i>S. cerevisiae RN1016 </i> (+ Xylose isomerase)	0.3449	<i>S. cerevisiae</i> WT	0.0345	0	0	0	0
CornStover	YES	2	<i>S. cerevisiae RN1016 </i> (+ Xylose isomerase)	0.3449	<i>C. acetobutylicum</i>	0.0345	0	0	0	0
CornFiber	YES	1	<i>S. cerevisiae</i> WT	0.2811			0	0	0	0
CornFiber	YES	2	<i>S. cerevisiae</i> WT	0.2811	<i>E. coli</i>	0.0281	0	0	0	0
CornFiber	YES	2	<i>S. cerevisiae</i> WT	0.2811	<i>S. cerevisiae RN1016 </i> (+ Xylose isomerase)	0.0281	0	0	0	0
CornFiber	YES	2	<i>S. cerevisiae</i> WT	0.2811	<i>C. acetobutylicum</i>	0.0281	0	0	0	0
CornCobs	YES	2	<i>C. acetobutylicum</i>	0.2643	<i>E. coli</i>	0.0264	18.5421	2.7	18.5421	2.7
CornCobs	NO	2	<i>C. acetobutylicum</i>	0.2643	<i>E. coli</i>	0.0264	18.5421	2.7	18.5421	2.7
CornCobs	YES	1	<i>C. acetobutylicum</i>	0.2643			0	0	0	0
CornCobs	NO	1	<i>C. acetobutylicum</i>	0.2643			0	0	0	0
CornCobs	YES	2	<i>C. acetobutylicum</i>	0.2643	<i>S. cerevisiae</i> WT	0.0264	0	0	0	0
CornCobs	NO	2	<i>C. acetobutylicum</i>	0.2643	<i>S. cerevisiae</i> WT	0.0264	0	0	0	0
CornCobs	YES	2	<i>C. acetobutylicum</i>	0.2643	<i>S. cerevisiae RN1016 </i> (+ Xylose isomerase)	0.0264	0	0	0	0
CornCobs	NO	2	<i>C. acetobutylicum</i>	0.2643	<i>S. cerevisiae RN1016 </i> (+ Xylose isomerase)	0.0264	0	0	0	0
CornFiber	YES	2	<i>C. acetobutylicum</i>	0.2623	<i>E. coli</i>	0.0262	46.3549	5.5	46.3549	5.5
CornFiber	NO	2	<i>C. acetobutylicum</i>	0.2623	<i>E. coli</i>	0.0262	46.3549	5.5	46.3549	5.5
CornFiber	YES	1	<i>C. acetobutylicum</i>	0.2623			0	0	0	0
CornFiber	NO	1	<i>C. acetobutylicum</i>	0.2623			0	0	0	0
CornFiber	YES	2	<i>C. acetobutylicum</i>	0.2623	<i>S. cerevisiae</i> WT	0.0262	0	0	0	0
CornFiber	NO	2	<i>C. acetobutylicum</i>	0.2623	<i>S. cerevisiae</i> WT	0.0262	0	0	0	0
CornFiber	YES	2	<i>C. acetobutylicum</i>	0.2623	<i>S. cerevisiae RN1016 </i> (+ Xylose isomerase)	0.0262	0	0	0	0
CornFiber	NO	2	<i>C. acetobutylicum</i>	0.2623	<i>S. cerevisiae RN1016 </i> (+ Xylose isomerase)	0.0262	0	0	0	0
CornStover	YES	2	<i>C. acetobutylicum</i>	0.2488	<i>E. coli</i>	0.0249	23.1775	3.8	23.1775	3.8
CornStover	NO	2	<i>C. acetobutylicum</i>	0.2488	<i>E. coli</i>	0.0249	23.1775	3.8	23.1775	3.8
CornStover	YES	1	<i>C. acetobutylicum</i>	0.2488			0	0	0	0
CornStover	NO	1	<i>C. acetobutylicum</i>	0.2488			0	0	0	0
CornStover	YES	2	<i>C. acetobutylicum</i>	0.2488	<i>S. cerevisiae</i> WT	0.0249	0	0	0	0
CornStover	NO	2	<i>C. acetobutylicum</i>	0.2488	<i>S. cerevisiae</i> WT	0.0249	0	0	0	0
CornStover	YES	2	<i>C. acetobutylicum</i>	0.2488	<i>S. cerevisiae RN1016 </i> (+ Xylose isomerase)	0.0249	0	0	0	0
CornStover	NO	2	<i>C. acetobutylicum</i>	0.2488	<i>S. cerevisiae RN1016 </i> (+ Xylose isomerase)	0.0249	0	0	0	0
CornStover	YES	1	<i>S. cerevisiae</i> WT	0.2487			0	0	0	0
CornStover	YES	2	<i>S. cerevisiae</i> WT	0.2487	<i>E. coli</i>	0.0249	0	0	0	0
CornStover	YES	2	<i>S. cerevisiae</i> WT	0.2487	<i>S. cerevisiae RN1016 </i> (+ Xylose isomerase)	0.0249	0	0	0	0
CornStover	YES	2	<i>S. cerevisiae</i> WT	0.2487	<i>C. acetobutylicum</i>	0.0249	0	0	0	0
CornCobs	YES	1	<i>S. cerevisiae</i> WT	0.2477			0	0	0	0
CornCobs	YES	2	<i>S. cerevisiae</i> WT	0.2477	<i>E. coli</i>	0.0248	0	0	0	0
CornCobs	YES	2	<i>S. cerevisiae</i> WT	0.2477	<i>S. cerevisiae RN1016 </i> (+ Xylose isomerase)	0.0248	0	0	0	0
CornCobs	YES	2	<i>S. cerevisiae</i> WT	0.2477	<i>C. acetobutylicum</i>	0.0248	0	0	0	0
CornFiber	NO	1	<i>E. coli</i>	0.0791			4.6341	0.6	4.6341	0.6
CornFiber	NO	2	<i>E. coli</i>	0.0791	<i>S. cerevisiae</i> WT	0.0079	4.6341	0.6	4.6341	0.6
CornFiber	NO	2	<i>E. coli</i>	0.0791	<i>S. cerevisiae RN1016 </i> (+ Xylose isomerase)	0.0079	4.6341	0.6	4.6341	0.6
CornFiber	NO	2	<i>E. coli</i>	0.0791	<i>C. acetobutylicum</i>	0.0079	4.6341	0.6	4.6341	0.6
CornCobs	NO	1	<i>E. coli</i>	0.0696			1.8567	0.3	1.8567	0.3
CornCobs	NO	2	<i>E. coli</i>	0.0696	<i>S. cerevisiae</i> WT	0.007	1.8567	0.3	1.8567	0.3
CornCobs	NO	2	<i>E. coli</i>	0.0696	<i>S. cerevisiae RN1016 </i> (+ Xylose isomerase)	0.007	1.8567	0.3	1.8567	0.3
CornCobs	NO	2	<i>E. coli</i>	0.0696	<i>C. acetobutylicum</i>	0.007	1.8567	0.3	1.8567	0.3
CornCobs	NO	2	<i>S. cerevisiae RN1016 </i> (+ Xylose isomerase)	0.0642	<i>E. coli</i>	0.0064	18.5421	2.7	18.5421	2.7
CornCobs	NO	1	<i>S. cerevisiae RN1016 </i> (+ Xylose isomerase)	0.0642			0	0	0	0
CornCobs	NO	2	<i>S. cerevisiae RN1016 </i> (+ Xylose isomerase)	0.0642	<i>S. cerevisiae</i> WT	0.0064	0	0	0	0
CornCobs	NO	2	<i>S. cerevisiae RN1016 </i> (+ Xylose isomerase)	0.0642	<i>C. acetobutylicum</i>	0.0064	0	0	0	0
CornFiber	NO	2	<i>S. cerevisiae RN1016 </i> (+ Xylose isomerase)	0.0588	<i>E. coli</i>	0.0059	46.3549	5.5	46.3549	5.5
CornStover	NO	2	<i>S. cerevisiae RN1016 </i> (+ Xylose isomerase)	0.0588	<i>E. coli</i>	0.0059	23.1775	3.8	23.1775	3.8
CornFiber	NO	1	<i>S. cerevisiae RN1016 </i> (+ Xylose isomerase)	0.0588			0	0	0	0
CornStover	NO	1	<i>S. cerevisiae RN1016 </i> (+ Xylose isomerase)	0.0588			0	0	0	0
CornFiber	NO	2	<i>S. cerevisiae RN1016 </i> (+ Xylose isomerase)	0.0588	<i>S. cerevisiae</i> WT	0.0059	0	0	0	0
CornFiber	NO	2	<i>S. cerevisiae RN1016 </i> (+ Xylose isomerase)	0.0588	<i>C. acetobutylicum</i>	0.0059	0	0	0	0
CornStover	NO	2	<i>S. cerevisiae RN1016 </i> (+ Xylose isomerase)	0.0588	<i>S. cerevisiae</i> WT	0.0059	0	0	0	0
CornStover	NO	2	<i>S. cerevisiae RN1016 </i> (+ Xylose isomerase)	0.0588	<i>C. acetobutylicum</i>	0.0059	0	0	0	0
CornStover	NO	1	<i>E. coli</i>	0.0575			2.3209	0.4	2.3209	0.4
CornStover	NO	2	<i>E. coli</i>	0.0575	<i>S. cerevisiae</i> WT	0.0058	2.3209	0.4	2.3209	0.4
CornStover	NO	2	<i>E. coli</i>	0.0575	<i>S. cerevisiae RN1016 </i> (+ Xylose isomerase)	0.0058	2.3209	0.4	2.3209	0.4
CornStover	NO	2	<i>E. coli</i>	0.0575	<i>C. acetobutylicum</i>	0.0058	2.3209	0.4	2.3209	0.4
CornCobs	NO	2	<i>S. cerevisiae</i> WT	0.0499	<i>E. coli</i>	0.005	18.5421	2.7	18.5421	2.7
CornCobs	NO	1	<i>S. cerevisiae</i> WT	0.0499			0	0	0	0
CornCobs	NO	2	<i>S. cerevisiae</i> WT	0.0499	<i>S. cerevisiae RN1016 </i> (+ Xylose isomerase)	0.005	0	0	0	0
CornCobs	NO	2	<i>S. cerevisiae</i> WT	0.0499	<i>C. acetobutylicum</i>	0.005	0	0	0	0
CornFiber	NO	2	<i>S. cerevisiae</i> WT	0.0483	<i>E. coli</i>	0.0048	46.3549	5.5	46.3549	5.5
CornFiber	NO	1	<i>S. cerevisiae</i> WT	0.0483			0	0	0	0
CornFiber	NO	2	<i>S. cerevisiae</i> WT	0.0483	<i>S. cerevisiae RN1016 </i> (+ Xylose isomerase)	0.0048	0	0	0	0
CornFiber	NO	2	<i>S. cerevisiae</i> WT	0.0483	<i>C. acetobutylicum</i>	0.0048	0	0	0	0
CornStover	NO	2	<i>S. cerevisiae</i> WT	0.0477	<i>E. coli</i>	0.0048	23.1775	3.8	23.1775	3.8
CornStover	NO	1	<i>S. cerevisiae</i> WT	0.0477			0	0	0	0
CornStover	NO	2	<i>S. cerevisiae</i> WT	0.0477	<i>S. cerevisiae RN1016 </i> (+ Xylose isomerase)	0.0048	0	0	0	0
CornStover	NO	2	<i>S. cerevisiae</i> WT	0.0477	<i>C. acetobutylicum</i>	0.0048	0	0	0	0

## Sheet: e. (R)-Propane-1,2-diol
Media Name	Oxygen	Pipe Steps	First Organism Name	First Organism Growth Rate	Second Organism Name	Second Organism Growth Rate	Minimal (R)-Propane-1,2-diol metabolite Production [g/Kg]	Minimal (R)-Propane-1,2-diol metabolite Carbon Utilization [%] [g/Kg]	Maximal (R)-Propane-1,2-diol metabolite Production [g/Kg]	Maximal (R)-Propane-1,2-diol metabolite Carbon Utilization [%] [g/Kg]
CornFiber	YES	1	<i>E. coli</i>	0.4689			0	0	0	0
CornFiber	YES	2	<i>E. coli</i>	0.4689	<i>S. cerevisiae</i> WT	0.0469	0	0	0	0
CornFiber	YES	2	<i>E. coli</i>	0.4689	<i>S. cerevisiae RN1016 </i> (+ Xylose isomerase)	0.0469	0	0	0	0
CornFiber	YES	2	<i>E. coli</i>	0.4689	<i>C. acetobutylicum</i>	0.0469	0	0	0	0
CornCobs	YES	1	<i>E. coli</i>	0.3966			0	0	0	0
CornCobs	YES	2	<i>E. coli</i>	0.3966	<i>S. cerevisiae</i> WT	0.0397	0	0	0	0
CornCobs	YES	2	<i>E. coli</i>	0.3966	<i>S. cerevisiae RN1016 </i> (+ Xylose isomerase)	0.0397	0	0	0	0
CornCobs	YES	2	<i>E. coli</i>	0.3966	<i>C. acetobutylicum</i>	0.0397	0	0	0	0
CornCobs	YES	1	<i>S. cerevisiae RN1016 </i> (+ Xylose isomerase)	0.3866			0	0	0	0
CornCobs	YES	2	<i>S. cerevisiae RN1016 </i> (+ Xylose isomerase)	0.3866	<i>E. coli</i>	0.0387	0	0	0	0
CornCobs	YES	2	<i>S. cerevisiae RN1016 </i> (+ Xylose isomerase)	0.3866	<i>S. cerevisiae</i> WT	0.0387	0	0	0	0
CornCobs	YES	2	<i>S. cerevisiae RN1016 </i> (+ Xylose isomerase)	0.3866	<i>C. acetobutylicum</i>	0.0387	0	0	0	0
CornFiber	YES	1	<i>S. cerevisiae RN1016 </i> (+ Xylose isomerase)	0.3838			0	0	0	0
CornFiber	YES	2	<i>S. cerevisiae RN1016 </i> (+ Xylose isomerase)	0.3838	<i>E. coli</i>	0.0384	0	0	0	0
CornFiber	YES	2	<i>S. cerevisiae RN1016 </i> (+ Xylose isomerase)	0.3838	<i>S. cerevisiae</i> WT	0.0384	0	0	0	0
CornFiber	YES	2	<i>S. cerevisiae RN1016 </i> (+ Xylose isomerase)	0.3838	<i>C. acetobutylicum</i>	0.0384	0	0	0	0
CornStover	YES	1	<i>E. coli</i>	0.3491			0	0	0	0
CornStover	YES	2	<i>E. coli</i>	0.3491	<i>S. cerevisiae</i> WT	0.0349	0	0	0	0
CornStover	YES	2	<i>E. coli</i>	0.3491	<i>S. cerevisiae RN1016 </i> (+ Xylose isomerase)	0.0349	0	0	0	0
CornStover	YES	2	<i>E. coli</i>	0.3491	<i>C. acetobutylicum</i>	0.0349	0	0	0	0
CornStover	YES	1	<i>S. cerevisiae RN1016 </i> (+ Xylose isomerase)	0.3449			0	0	0	0
CornStover	YES	2	<i>S. cerevisiae RN1016 </i> (+ Xylose isomerase)	0.3449	<i>E. coli</i>	0.0345	0	0	0	0
CornStover	YES	2	<i>S. cerevisiae RN1016 </i> (+ Xylose isomerase)	0.3449	<i>S. cerevisiae</i> WT	0.0345	0	0	0	0
CornStover	YES	2	<i>S. cerevisiae RN1016 </i> (+ Xylose isomerase)	0.3449	<i>C. acetobutylicum</i>	0.0345	0	0	0	0
CornFiber	YES	1	<i>S. cerevisiae</i> WT	0.2811			0	0	0	0
CornFiber	YES	2	<i>S. cerevisiae</i> WT	0.2811	<i>E. coli</i>	0.0281	0	0	0	0
CornFiber	YES	2	<i>S. cerevisiae</i> WT	0.2811	<i>S. cerevisiae RN1016 </i> (+ Xylose isomerase)	0.0281	0	0	0	0
CornFiber	YES	2	<i>S. cerevisiae</i> WT	0.2811	<i>C. acetobutylicum</i>	0.0281	0	0	0	0
CornCobs	YES	1	<i>C. acetobutylicum</i>	0.2643			0	0	0	0
CornCobs	NO	1	<i>C. acetobutylicum</i>	0.2643			0	0	0	0
CornCobs	YES	2	<i>C. acetobutylicum</i>	0.2643	<i>E. coli</i>	0.0264	0	0	0	0
CornCobs	NO	2	<i>C. acetobutylicum</i>	0.2643	<i>E. coli</i>	0.0264	0	0	0	0
CornCobs	YES	2	<i>C. acetobutylicum</i>	0.2643	<i>S. cerevisiae</i> WT	0.0264	0	0	0	0
CornCobs	NO	2	<i>C. acetobutylicum</i>	0.2643	<i>S. cerevisiae</i> WT	0.0264	0	0	0	0
CornCobs	YES	2	<i>C. acetobutylicum</i>	0.2643	<i>S. cerevisiae RN1016 </i> (+ Xylose isomerase)	0.0264	0	0	0	0
CornCobs	NO	2	<i>C. acetobutylicum</i>	0.2643	<i>S. cerevisiae RN1016 </i> (+ Xylose isomerase)	0.0264	0	0	0	0
CornFiber	YES	1	<i>C. acetobutylicum</i>	0.2623			0	0	0	0
CornFiber	NO	1	<i>C. acetobutylicum</i>	0.2623			0	0	0	0
CornFiber	YES	2	<i>C. acetobutylicum</i>	0.2623	<i>E. coli</i>	0.0262	0	0	0	0
CornFiber	NO	2	<i>C. acetobutylicum</i>	0.2623	<i>E. coli</i>	0.0262	0	0	0	0
CornFiber	YES	2	<i>C. acetobutylicum</i>	0.2623	<i>S. cerevisiae</i> WT	0.0262	0	0	0	0
CornFiber	NO	2	<i>C. acetobutylicum</i>	0.2623	<i>S. cerevisiae</i> WT	0.0262	0	0	0	0
CornFiber	YES	2	<i>C. acetobutylicum</i>	0.2623	<i>S. cerevisiae RN1016 </i> (+ Xylose isomerase)	0.0262	0	0	0	0
CornFiber	NO	2	<i>C. acetobutylicum</i>	0.2623	<i>S. cerevisiae RN1016 </i> (+ Xylose isomerase)	0.0262	0	0	0	0
CornStover	YES	1	<i>C. acetobutylicum</i>	0.2488			0	0	0	0
CornStover	NO	1	<i>C. acetobutylicum</i>	0.2488			0	0	0	0
CornStover	YES	2	<i>C. acetobutylicum</i>	0.2488	<i>E. coli</i>	0.0249	0	0	0	0
CornStover	NO	2	<i>C. acetobutylicum</i>	0.2488	<i>E. coli</i>	0.0249	0	0	0	0
CornStover	YES	2	<i>C. acetobutylicum</i>	0.2488	<i>S. cerevisiae</i> WT	0.0249	0	0	0	0
CornStover	NO	2	<i>C. acetobutylicum</i>	0.2488	<i>S. cerevisiae</i> WT	0.0249	0	0	0	0
CornStover	YES	2	<i>C. acetobutylicum</i>	0.2488	<i>S. cerevisiae RN1016 </i> (+ Xylose isomerase)	0.0249	0	0	0	0
CornStover	NO	2	<i>C. acetobutylicum</i>	0.2488	<i>S. cerevisiae RN1016 </i> (+ Xylose isomerase)	0.0249	0	0	0	0
CornStover	YES	1	<i>S. cerevisiae</i> WT	0.2487			0	0	0	0
CornStover	YES	2	<i>S. cerevisiae</i> WT	0.2487	<i>E. coli</i>	0.0249	0	0	0	0
CornStover	YES	2	<i>S. cerevisiae</i> WT	0.2487	<i>S. cerevisiae RN1016 </i> (+ Xylose isomerase)	0.0249	0	0	0	0
CornStover	YES	2	<i>S. cerevisiae</i> WT	0.2487	<i>C. acetobutylicum</i>	0.0249	0	0	0	0
CornCobs	YES	1	<i>S. cerevisiae</i> WT	0.2477			0	0	0	0
CornCobs	YES	2	<i>S. cerevisiae</i> WT	0.2477	<i>E. coli</i>	0.0248	0	0	0	0
CornCobs	YES	2	<i>S. cerevisiae</i> WT	0.2477	<i>S. cerevisiae RN1016 </i> (+ Xylose isomerase)	0.0248	0	0	0	0
CornCobs	YES	2	<i>S. cerevisiae</i> WT	0.2477	<i>C. acetobutylicum</i>	0.0248	0	0	0	0
CornFiber	NO	1	<i>E. coli</i>	0.0791			0	0	0	0
CornFiber	NO	2	<i>E. coli</i>	0.0791	<i>S. cerevisiae</i> WT	0.0079	0	0	0	0
CornFiber	NO	2	<i>E. coli</i>	0.0791	<i>S. cerevisiae RN1016 </i> (+ Xylose isomerase)	0.0079	0	0	0	0
CornFiber	NO	2	<i>E. coli</i>	0.0791	<i>C. acetobutylicum</i>	0.0079	0	0	0	0
CornCobs	NO	1	<i>E. coli</i>	0.0696			0	0	0	0
CornCobs	NO	2	<i>E. coli</i>	0.0696	<i>S. cerevisiae</i> WT	0.007	0	0	0	0
CornCobs	NO	2	<i>E. coli</i>	0.0696	<i>S. cerevisiae RN1016 </i> (+ Xylose isomerase)	0.007	0	0	0	0
CornCobs	NO	2	<i>E. coli</i>	0.0696	<i>C. acetobutylicum</i>	0.007	0	0	0	0
CornCobs	NO	1	<i>S. cerevisiae RN1016 </i> (+ Xylose isomerase)	0.0642			0	0	0	0
CornCobs	NO	2	<i>S. cerevisiae RN1016 </i> (+ Xylose isomerase)	0.0642	<i>E. coli</i>	0.0064	0	0	0	0
CornCobs	NO	2	<i>S. cerevisiae RN1016 </i> (+ Xylose isomerase)	0.0642	<i>S. cerevisiae</i> WT	0.0064	0	0	0	0
CornCobs	NO	2	<i>S. cerevisiae RN1016 </i> (+ Xylose isomerase)	0.0642	<i>C. acetobutylicum</i>	0.0064	0	0	0	0
CornFiber	NO	1	<i>S. cerevisiae RN1016 </i> (+ Xylose isomerase)	0.0588			0	0	0	0
CornStover	NO	1	<i>S. cerevisiae RN1016 </i> (+ Xylose isomerase)	0.0588			0	0	0	0
CornFiber	NO	2	<i>S. cerevisiae RN1016 </i> (+ Xylose isomerase)	0.0588	<i>E. coli</i>	0.0059	0	0	0	0
CornFiber	NO	2	<i>S. cerevisiae RN1016 </i> (+ Xylose isomerase)	0.0588	<i>S. cerevisiae</i> WT	0.0059	0	0	0	0
CornFiber	NO	2	<i>S. cerevisiae RN1016 </i> (+ Xylose isomerase)	0.0588	<i>C. acetobutylicum</i>	0.0059	0	0	0	0
CornStover	NO	2	<i>S. cerevisiae RN1016 </i> (+ Xylose isomerase)	0.0588	<i>E. coli</i>	0.0059	0	0	0	0
CornStover	NO	2	<i>S. cerevisiae RN1016 </i> (+ Xylose isomerase)	0.0588	<i>S. cerevisiae</i> WT	0.0059	0	0	0	0
CornStover	NO	2	<i>S. cerevisiae RN1016 </i> (+ Xylose isomerase)	0.0588	<i>C. acetobutylicum</i>	0.0059	0	0	0	0
CornStover	NO	1	<i>E. coli</i>	0.0575			0	0	0	0
CornStover	NO	2	<i>E. coli</i>	0.0575	<i>S. cerevisiae</i> WT	0.0058	0	0	0	0
CornStover	NO	2	<i>E. coli</i>	0.0575	<i>S. cerevisiae RN1016 </i> (+ Xylose isomerase)	0.0058	0	0	0	0
CornStover	NO	2	<i>E. coli</i>	0.0575	<i>C. acetobutylicum</i>	0.0058	0	0	0	0
CornCobs	NO	1	<i>S. cerevisiae</i> WT	0.0499			0	0	0	0
CornCobs	NO	2	<i>S. cerevisiae</i> WT	0.0499	<i>E. coli</i>	0.005	0	0	0	0
CornCobs	NO	2	<i>S. cerevisiae</i> WT	0.0499	<i>S. cerevisiae RN1016 </i> (+ Xylose isomerase)	0.005	0	0	0	0
CornCobs	NO	2	<i>S. cerevisiae</i> WT	0.0499	<i>C. acetobutylicum</i>	0.005	0	0	0	0
CornFiber	NO	1	<i>S. cerevisiae</i> WT	0.0483			0	0	0	0
CornFiber	NO	2	<i>S. cerevisiae</i> WT	0.0483	<i>E. coli</i>	0.0048	0	0	0	0
CornFiber	NO	2	<i>S. cerevisiae</i> WT	0.0483	<i>S. cerevisiae RN1016 </i> (+ Xylose isomerase)	0.0048	0	0	0	0
CornFiber	NO	2	<i>S. cerevisiae</i> WT	0.0483	<i>C. acetobutylicum</i>	0.0048	0	0	0	0
CornStover	NO	1	<i>S. cerevisiae</i> WT	0.0477			0	0	0	0
CornStover	NO	2	<i>S. cerevisiae</i> WT	0.0477	<i>E. coli</i>	0.0048	0	0	0	0
CornStover	NO	2	<i>S. cerevisiae</i> WT	0.0477	<i>S. cerevisiae RN1016 </i> (+ Xylose isomerase)	0.0048	0	0	0	0
CornStover	NO	2	<i>S. cerevisiae</i> WT	0.0477	<i>C. acetobutylicum</i>	0.0048	0	0	0	0
