# Supplementary material for: Distributed flux balance analysis simulations of serial biomass fermentation by two organisms
Source: PLoS One. 2020 Jan 16;15(1):e0227363. doi: 10.1371/journal.pone.0227363 (PMC6964848; doi:10.1371/journal.pone.0227363)
Supplement: S2 Table — (XLSX) [file pone.0227363.s005.xlsx]

## Sheet: a. Sensitivity
Ethanol Production - Media Sensitivity analysis	Relative Yield
Name of Omitted Metabolite	Minimal Ethanol	Maximal Ethanol	Min-to-Max Gap
L-Tyrosine	86.6087	100.177	13.5687
D-Glucose	44.0786	57.2309	13.1523
D-Mannose	85.4264	97.876	12.4496
D-Xylose	86.2571	98.6848	12.4277
L-Tryptophan	87.4596	99.8623	12.4027
Ascorbic acid	87.3232	99.7172	12.394
L-Arabinose	87.4383	99.8278	12.3895
L-Phenylalanine	87.1957	99.5836	12.3879
Cystine	87.5558	99.9411	12.3853
Eicosadienoic acid	87.5558	99.9411	12.3853
Eicosenoic acid	87.5558	99.9411	12.3853
Pentadecanoic acid	87.5558	99.9411	12.3853
Linoleic acid	87.5558	99.9411	12.3853
Arachidonic acid	87.5558	99.9411	12.3853
vitamin A	87.5558	99.9411	12.3853
Myristic acid	87.5558	99.9411	12.3853
Arachidic acid	87.5558	99.9411	12.3853
alpha-Linolenic acid	87.5558	99.9411	12.3853
3,6-anhydrogalactose	87.5558	99.9411	12.3853
myristoleic acid	87.5558	99.9411	12.3853
Palmitoleic acid	87.5558	99.9411	12.3853
Oleic acid	87.5558	99.9411	12.3853
L-Leucine	87.7414	100.096	12.3545
L-Histidine	87.6403	99.9646	12.3243
Glycine	87.9432	100.267	12.3241
L-Serine	87.8023	99.4473	11.645
L-Lysine	88.0112	99.6283	11.6171
L-Proline	87.4303	99.0368	11.6065
L-Valine	87.7439	99.2483	11.5044
L-Isoleucine	87.8124	99.1603	11.3479
L-Threonine	86.2012	97.4025	11.2013
L-Arginine	88.3634	99.2372	10.8738
L-Alanine	87.813	98.5323	10.7193
L-Glutamic acid	90.4017	100.287	9.8854
L-Aspartic acid	89.5132	97.9824	8.4692
D-Galactose	45.9991	53.2318	7.2327
L-Asparagine	91.7695	96.3334	4.5639

## Sheet: b. Gradient
Ethanol Production - Media Gradient
Name of Omitted Metabolite	Minimal Ethanol Production	Maximal Ethanol Production	Min-to-Max Gap
L-Asparagine	-0.3492	0.3509	0.7001
L-Aspartic acid	-0.3464	0.3455	0.6919
L-Serine	-0.2202	0.4375	0.6577
L-Threonine	0.1888	0.5758	0.387
L-Proline	0	0.1984	0.1984
L-Glutamic acid	-0.3137	-0.1636	0.1501
L-Leucine	0	0	0
Cystine	0	0	0
Eicosadienoic acid	0	0	0
Eicosenoic acid	0	0	0
Pentadecanoic acid	0	0	0
L-Histidine	0	0	0
Linoleic acid	0	0	0
L-Valine	0	0	0
Arachidonic acid	0	0	0
L-Isoleucine	0	0	0
vitamin A	0	0	0
L-Lysine	0	0	0
Myristic acid	0	0	0
Arachidic acid	0	0	0
alpha-Linolenic acid	0	0	0
3,6-anhydrogalactose	0	0	0
myristoleic acid	0	0	0
Palmitoleic acid	0	0	0
Oleic acid	0	0	0
L-Phenylalanine	0	0	0
L-Arginine	0	-0.0009	-0.0009
L-Tryptophan	-0.0005	-0.0032	-0.0027
L-Alanine	-0.0005	-0.006	-0.0055
Ascorbic acid	0.2173	0.2095	-0.0078
D-Galactose	0.2552	0.2468	-0.0084
D-Xylose	0.2552	0.2468	-0.0084
L-Arabinose	0.2552	0.2468	-0.0084
Glycine	-0.3077	-0.3211	-0.0134
D-Mannose	0.4709	0.4555	-0.0154
D-Glucose	0.4709	0.4555	-0.0154
L-Tyrosine	0.1885	-0.065	-0.2535
